# Supplementary material for: Theoretical study on the electronic structure and second-order nonlinear optical properties of benzannulated or selenophene-annulated expanded helicenes
Source: Royal Society of Chemistry journal article supplement (doi:10.1039/c9ra01136f), 2019-01-01
Supplement: c9ra01136f1.pdf [file c9ra01136f1.pdf]

# Theoretical Study on the Electronic Structure and Second-Order Nonlinear Optical Properties of Benzannulated or Selenophene-annulated Expanded

Li-jing Gong,<sup>\*,a,†</sup> Chun-yu Liu,<sup>b,‡</sup> Cheng Ma,<sup>a</sup> Wan-feng Lin,<sup>a</sup> Jin-kai Lv,<sup>a</sup> and Xiang-yu Zhang<sup>a</sup>

<sup>a</sup>Aviation University of Air Force, Changchun 130022, China

<sup>b</sup>Institute of Functional Material Chemistry, National & Local United Engineering Lab for Power Battery, Faculty of Chemistry, Northeast Normal University, Changchun, 130024 Jilin, China

## Contents

| Index                                                                                                                                                               | Page |
|---------------------------------------------------------------------------------------------------------------------------------------------------------------------|------|
| 1. The selected bond lengths for helicene <b>H1</b> between experiment and calculation.....                                                                         | S2   |
| 2. Contour plots of the HOMO and LUMO for the studied helicenes <b>H2-H4</b> , <b>H6-H9</b> , <b>H11</b> , <b>H16-H18</b> and <b>H20-H23</b> , and <b>H25</b> ..... | S4   |
| 3. The computed main energy absorption band using the different basis sets level for helicene <b>H1</b> .....                                                       | S4   |
| 4. The computed main energy absorption band using the different functionals for helicene <b>H1</b> .....                                                            | S4   |
| 5. Electron density difference maps of helicenes <b>H2-H9</b> , <b>H11-H14</b> , <b>H16-H23</b> and <b>H25-H28</b> .....                                            | S5   |
| 6. The calculated $\beta_{\text{HRS}}$ values ( $\times 10^{-30}$ esu) of helicenes <b>H1-H28</b> by using four DFT functionals.....                                | S6   |

**Table S1.** The selected bond lengths for helicene **H1** between experiment and calculation.

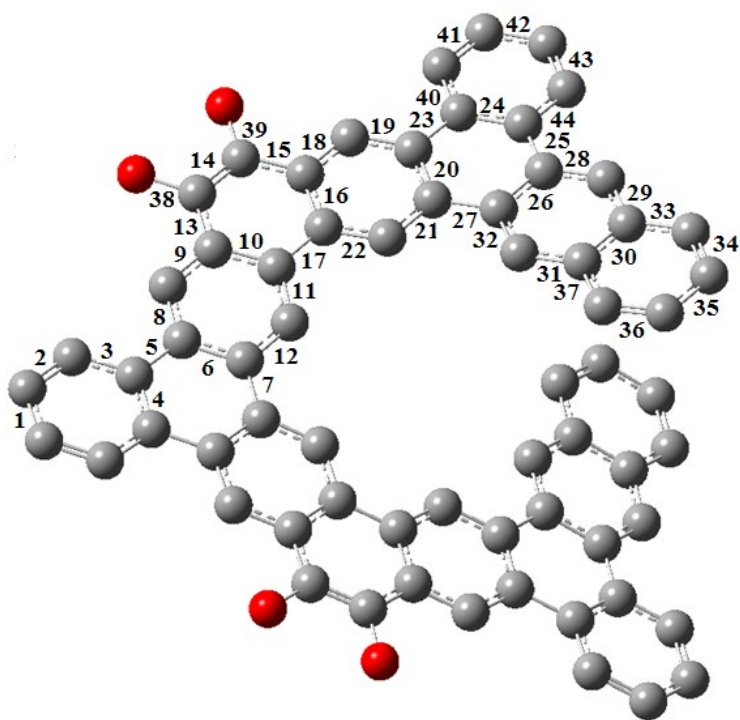

Optimized geometry of helicene **H1** (not show hydrogens)

| Bond | B3LYP | Experiment | Difference |
|------|-------|------------|------------|
| 1    | 1.399 | 1.405      | 0.006      |
| 2    | 1.384 | 1.390      | -0.006     |
| 3    | 1.411 | 1.425      | -0.014     |
| 4    | 1.420 | 1.417      | 0.003      |
| 5    | 1.469 | 1.487      | -0.018     |
| 6    | 1.427 | 1.420      | 0.007      |
| 7    | 1.468 | 1.463      | 0.005      |
| 8    | 1.397 | 1.396      | 0.001      |
| 9    | 1.400 | 1.397      | 0.003      |
| 10   | 1.429 | 1.426      | 0.003      |
| 11   | 1.398 | 1.396      | 0.002      |
| 12   | 1.400 | 1.378      | 0.002      |
| 13   | 1.434 | 1.434      | 0.000      |
| 14   | 1.365 | 1.365      | 0.000      |
| 15   | 1.439 | 1.424      | 0.015      |
| 16   | 1.425 | 1.408      | 0.017      |
| 17   | 1.462 | 1.456      | 0.006      |

|    |       |       |        |
|----|-------|-------|--------|
| 18 | 1.398 | 1.405 | -0.007 |
| 19 | 1.396 | 1.385 | 0.011  |
| 20 | 1.427 | 1.431 | -0.004 |
| 21 | 1.399 | 1.379 | 0.020  |
| 22 | 1.400 | 1.410 | -0.010 |
| 23 | 1.471 | 1.476 | -0.005 |
| 24 | 1.419 | 1.416 | 0.003  |
| 25 | 1.473 | 1.472 | 0.001  |
| 26 | 1.440 | 1.442 | -0.002 |
| 27 | 1.473 | 1.471 | 0.002  |
| 28 | 1.390 | 1.389 | 0.001  |
| 29 | 1.408 | 1.422 | 0.014  |
| 30 | 1.431 | 1.416 | 0.015  |
| 31 | 1.408 | 1.402 | 0.006  |
| 32 | 1.391 | 1.378 | 0.013  |
| 33 | 1.423 | 1.419 | 0.004  |
| 34 | 1.374 | 1.363 | 0.011  |
| 35 | 1.420 | 1.404 | 0.016  |
| 36 | 1.374 | 1.374 | 0.000  |
| 37 | 1.423 | 1.430 | -0.007 |
| 38 | 1.392 | 1.384 | 0.008  |
| 39 | 1.360 | 1.393 | -0.033 |
| 40 | 1.410 | 1.419 | -0.009 |
| 41 | 1.385 | 1.396 | -0.011 |
| 42 | 1.399 | 1.404 | -0.005 |
| 43 | 1.385 | 1.398 | -0.013 |
| 44 | 1.410 | 1.414 | -0.004 |

---

**Note:** the difference is equal to calculation value minus experimental value

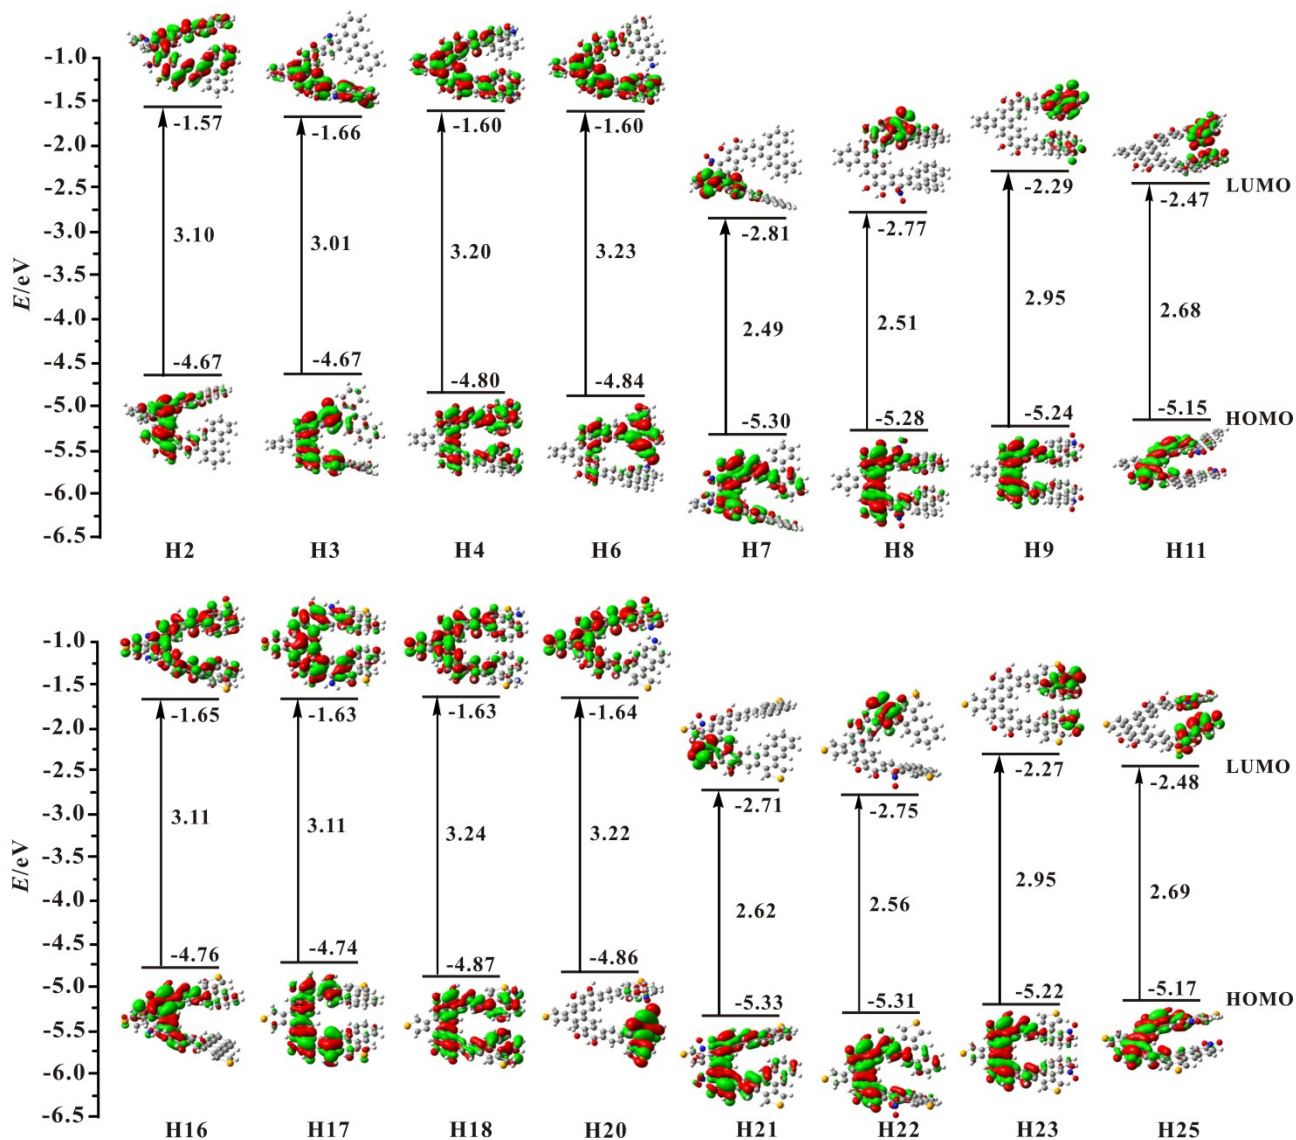

**Fig. S1.** Contour plots of the HOMO and LUMO for the studied helicenes **H2-H4**, **H6-H9**, **H11**, **H16-H18** and **H20-H23**, and **H25**.

**Table S2.** The computed main energy absorption band ( $\lambda$ , nm) using the B3LYP functional at the different basis sets level for helicene **H1**.

| Basis set | 6-31G(d) | 6-31G(d,p) | 6-31+G(d) | 6-311+G(d) |
|-----------|----------|------------|-----------|------------|
| $\lambda$ | 311.90   | 312.22     | 318.21    | 319.91     |

**Table S3.** The computed main energy absorption band ( $\lambda$ , nm) using the different functionals at 6-31+G(d) basis set level for helicene **H1**.

| Functional | B3LYP  | M06-2X | CAM-B3LYP | BH&HLYP |
|------------|--------|--------|-----------|---------|
| $\lambda$  | 318.21 | 301.10 | 300.13    | 298.83  |

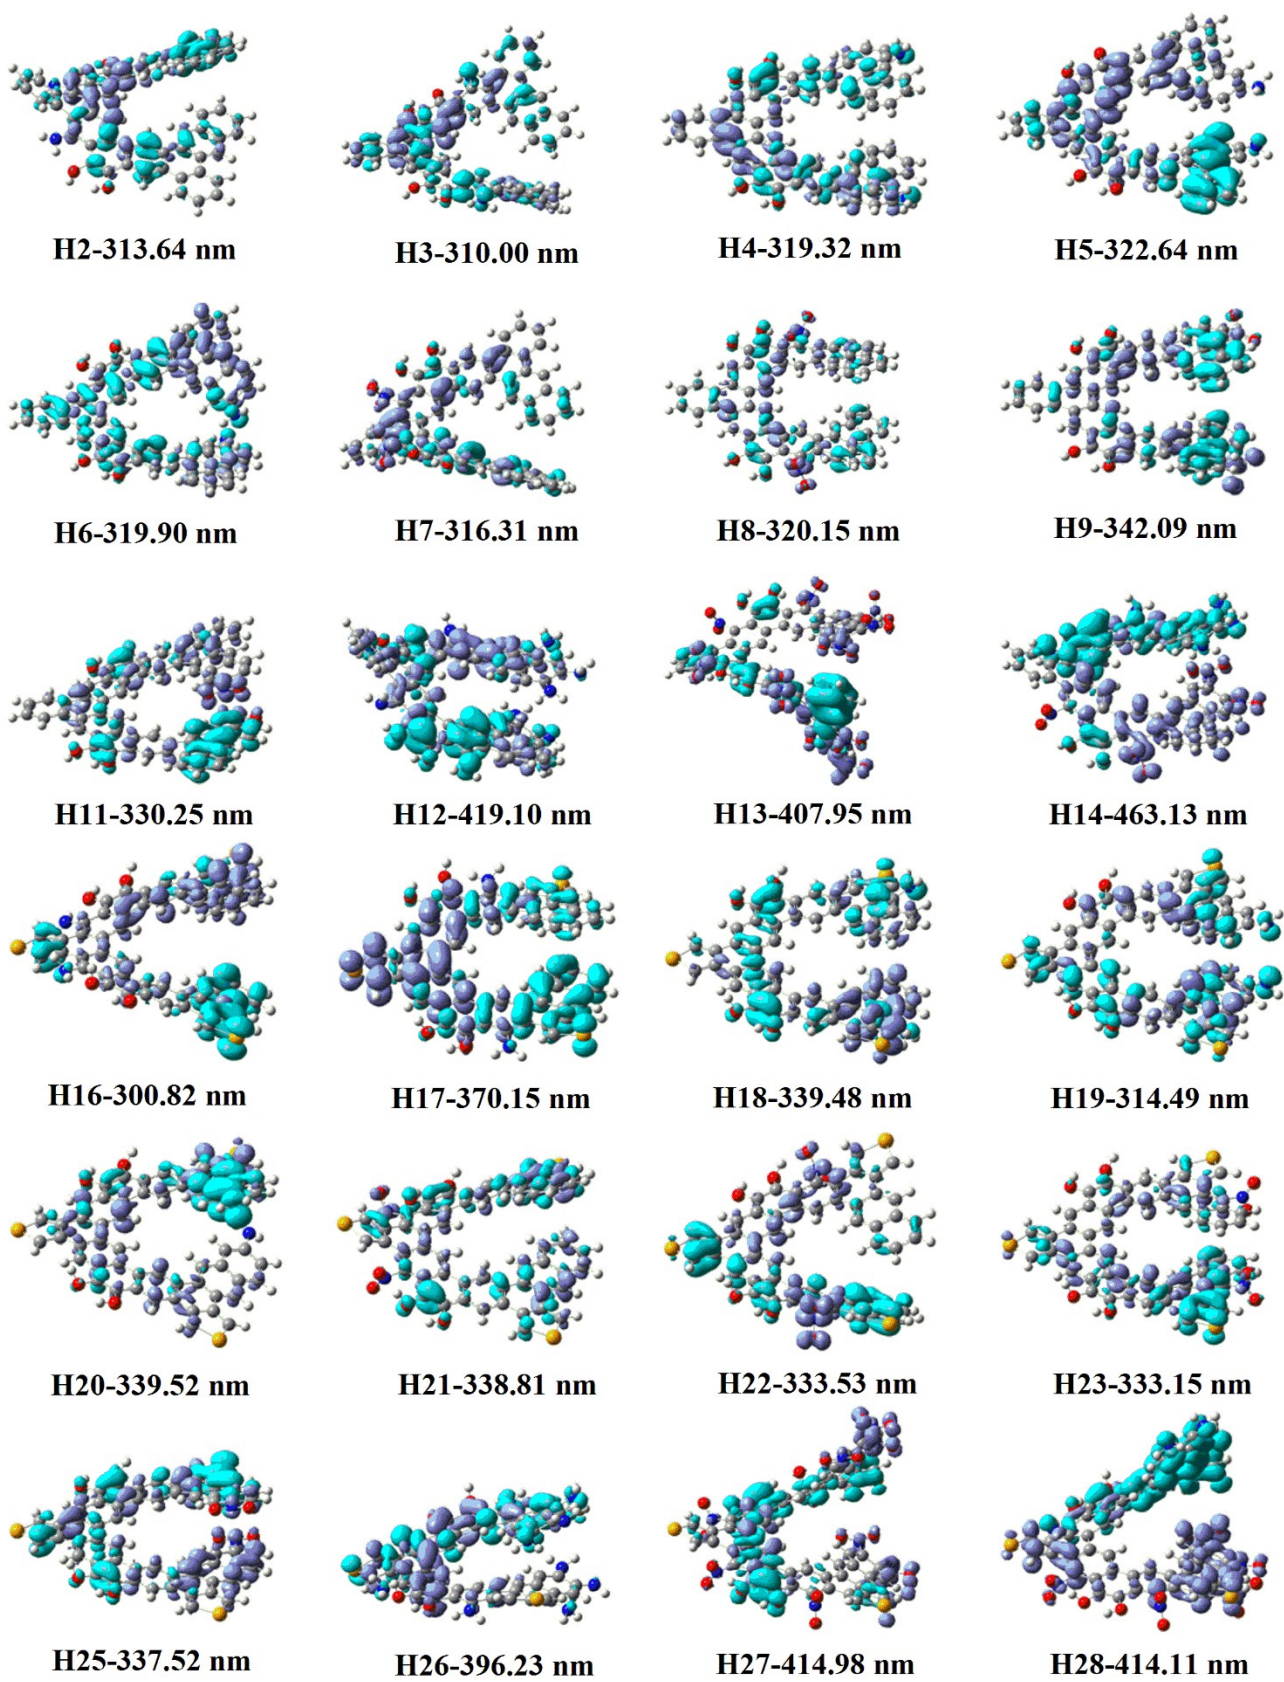

**Fig. S2.** Electron density difference maps of helicenes H2-H9, H11-H14, H16-H23 and H25-H28. Blue and purple colours indicate depletion and accumulation of electron density, respectively.

**Table S4.** The calculated  $\beta_{\text{HRS}}$  values ( $\times 10^{-30}$  esu) of helicenes **H1-H14** by using four DFT functionals associated with the 6-31+G(d) basis set and the calculated  $\beta_{\text{HRS}}$  values ( $\times 10^{-30}$  esu) of the helicenes **H15-H28** by using four DFT functionals associated with the 6-31+G(d) for O, N, C and H atoms and LANL2DZ basis set for Se atom.

| Compound   | B3LYP | CAM-B3LYP | M06-2X | BH&HLYP |
|------------|-------|-----------|--------|---------|
| <b>H1</b>  | 7.67  | 5.26      | 5.52   | 4.97    |
| <b>H2</b>  | 17.61 | 10.57     | 11.26  | 10.36   |
| <b>H3</b>  | 7.87  | 4.86      | 5.18   | 4.80    |
| <b>H4</b>  | 6.55  | 5.02      | 5.28   | 4.83    |
| <b>H5</b>  | 14.99 | 9.41      | 10.07  | 9.93    |
| <b>H6</b>  | 7.03  | 5.59      | 6.06   | 5.48    |
| <b>H7</b>  | 15.93 | 8.39      | 7.77   | 9.12    |
| <b>H8</b>  | 22.67 | 11.04     | 10.31  | 10.71   |
| <b>H9</b>  | 16.08 | 9.70      | 10.19  | 9.64    |
| <b>H10</b> | 62.78 | 28.88     | 28.66  | 31.46   |
| <b>H11</b> | 24.64 | 14.11     | 14.34  | 14.47   |
| <b>H12</b> | 16.28 | 10.16     | 10.99  | 10.05   |
| <b>H13</b> | 46.40 | 22.23     | 23.74  | 24.03   |
| <b>H14</b> | 50.51 | 18.21     | 19.26  | 19.65   |
| <b>H15</b> | 8.79  | 5.89      | 6.10   | 5.58    |
| <b>H16</b> | 14.72 | 8.50      | 8.84   | 8.46    |
| <b>H17</b> | 8.93  | 5.79      | 6.23   | 5.74    |
| <b>H18</b> | 7.78  | 5.72      | 5.78   | 5.44    |
| <b>H19</b> | 16.14 | 10.11     | 10.72  | 10.82   |
| <b>H20</b> | 8.84  | 5.90      | 6.27   | 5.87    |
| <b>H21</b> | 15.30 | 7.89      | 8.13   | 8.28    |
| <b>H22</b> | 17.31 | 7.96      | 7.47   | 7.58    |
| <b>H23</b> | 12.43 | 7.82      | 8.30   | 7.54    |
| <b>H24</b> | 65.19 | 29.95     | 29.80  | 32.47   |
| <b>H25</b> | 25.35 | 15.10     | 15.52  | 15.17   |

---

|            |       |       |       |       |
|------------|-------|-------|-------|-------|
| <b>H26</b> | 13.54 | 8.30  | 8.63  | 8.67  |
| <b>H27</b> | 52.45 | 26.10 | 27.31 | 27.62 |
| <b>H28</b> | 38.33 | 15.29 | 16.21 | 16.28 |

---
